# Supplementary material for: Pre-existing chromosomal polymorphisms in pathogenic E. coli potentiate the evolution of resistance to a last-resort antibiotic
Source: eLife. 2022 Aug 9;11:e78834. doi: 10.7554/eLife.78834 (PMC9363117; doi:10.7554/eLife.78834)
Supplement: Supplementary file 1. [file elife-78834-supp1.xlsx]

## Sheet: Sheet 1 - Supplementary Table 1
Supplementary file 1- Colistin MIC of the evolved populations
		Population ID with MIC (mg/L)
	Sample day	Population ID	MIC (mg/L)
	D6	1	16
	D6	4	32
	D6	7	16
	D6	8	16
	D6	9	16
	D6	10	16
	D6	11	16
	D6	13	32
	D6	17	32
	D6	20	32
	D6	21	32
	D6	22	32
	D6	26	16
	D6	32	8
	D6	37	32
	D6	38	16
	D6	40	16
	D6	42	16
	D6	44	16
	D6	47	32
	D6	48	32
	D6	60	16
	D7	4	32
	D7	13	32
	D7	42	32
	D7	47	32
