# Supplementary material for: Pre-existing chromosomal polymorphisms in pathogenic E. coli potentiate the evolution of resistance to a last-resort antibiotic
Source: eLife. 2022 Aug 9;11:e78834. doi: 10.7554/eLife.78834 (PMC9363117; doi:10.7554/eLife.78834)
Supplement: Supplementary file 2. [file elife-78834-supp2.xlsx]

## Sheet: Sheet 1
Supplementary file 2 - Primers used in this study
Primer ID	Sequence 5'- 3'	Description
pSEVA fwd	GTCGTGACTGGGAAAACCCTG	Vector backbone amplification for Gibson assembly
pSEVA Rev	TCCTGTGTGAAATTGTTATCCGCT	Vector backbone amplification for Gibson assembly
p16 mcr fwd	GATAACAATTTCACACAGGAGGATTGCGCAATGATTGC	mcr-1 gene and promoter amplification for Gibson assembly
p16 mcr rev	AGGGTTTTCCCAGTCACGACCATAATACGAATGGAGTGTGC	mcr-1 gene and promoter amplification for Gibson assembly
pSEVA_MCR seq 1	CGGCGGATTTGTCCTACTCA	Sequence verification of pSEVA:MCR-1 construct
pSEVA_MCR seq 2	ACAGCGTGGTGATCAGTAGC	Sequence verification of pSEVA:MCR-1 construct
pSEVA_MCR seq 3	ACCCCTGGATTCTCACCAAT	Sequence verification of pSEVA:MCR-1 construct
pSEVA_MCR seq 4	CGTATCATTGGTTTGGGTGTGC	PCR and Sequence verification of pSEVA:MCR-1 construct
pSEVA_MCR seq 5	GGTGCAGCATGATCAGCATATC	PCR and Sequence verification of pSEVA:MCR-1 construct
LpxC*	G*C*ATGACCGGATTTATAAGCGGTAAATGCACCAATAATATTGTGACCACACATGAACAAGTCACCGtTCGCATCGAGCATTTTGTGACG*C*	MAGE primer for lpxC mutation (I244N)
LpxC* FP	TTTATGCGCCAGATCAGCC	Forward primer for PCR and sequence verification of lpxC*
LpxC* RP	GTCCACAGCACGAATGAAG	Reverse primer for PCR and sequence verification of lpxC*
