# Supplementary material for: Pre-existing chromosomal polymorphisms in pathogenic E. coli potentiate the evolution of resistance to a last-resort antibiotic
Source: eLife. 2022 Aug 9;11:e78834. doi: 10.7554/eLife.78834 (PMC9363117; doi:10.7554/eLife.78834)
Supplement: Supplementary file 3. [file elife-78834-supp3.xlsx]

## Sheet: Supplementary-Table-3
Supplementary file 3 - Accessions, phylogroup, and SNPs in lpxC gene in E. coli isolates.
Isolate	Study	Phylogroup	SNPs (all)	SNPs (non-synonymous)	Included in filtered analysis
reference	reference	A	0	0	yes
SRR11948631	rehab	B1	2	0	yes
SRR11948635	rehab	B2	5	0	yes
SRR11948637	rehab	B2	5	0	no
SRR11948638	rehab	Unknown	3	1	no
SRR11948640	rehab	E	0	0	yes
SRR11948642	rehab	A	0	0	yes
SRR11948643	rehab	B1	0	0	yes
SRR11948644	rehab	A	0	0	yes
SRR11948647	rehab	A	0	0	yes
SRR11948648	rehab	Unknown	2	0	no
SRR11948649	rehab	B1	3	0	yes
SRR11948650	rehab	A	2	0	yes
SRR11948651	rehab	B1	0	0	yes
SRR11948652	rehab	B1	0	0	no
SRR11948653	rehab	A	0	0	yes
SRR11948654	rehab	G	6	0	no
SRR11948655	rehab	C	1	0	yes
SRR11948656	rehab	A	0	0	yes
SRR11948657	rehab	cladeIII	34	0	no
SRR11948658	rehab	cladeIII	34	0	no
SRR11948659	rehab	C	1	0	no
SRR11948660	rehab	G	6	0	yes
SRR11948662	rehab	A	0	0	no
SRR11948663	rehab	E	2	0	yes
SRR11948664	rehab	A	0	0	no
SRR11948665	rehab	C	1	0	no
SRR11948666	rehab	C	1	0	no
SRR11948668	rehab	B1	0	0	yes
SRR11948669	rehab	B1	0	0	yes
SRR11948671	rehab	B1	1	0	yes
SRR11948677	rehab	B1	1	0	yes
SRR11948678	rehab	C	1	0	yes
SRR11948680	rehab	D	6	0	yes
SRR11948681	rehab	B2	9	0	yes
SRR11948685	rehab	D	6	0	yes
SRR11948686	rehab	E	5	0	yes
SRR11948687	rehab	B1	0	0	yes
SRR11948688	rehab	B1	1	0	no
SRR11948690	rehab	B1	1	0	yes
SRR11948692	rehab	B2	9	0	yes
SRR11948693	rehab	C	1	0	yes
SRR11948694	rehab	D	6	0	yes
SRR11948697	rehab	D	6	0	no
SRR11948698	rehab	A	1	0	yes
SRR11948700	rehab	B1	0	0	yes
SRR11948708	rehab	B2	4	0	yes
SRR11948710	rehab	B1	0	0	yes
SRR11948711	rehab	B1	0	0	no
SRR11948712	rehab	B1	0	0	yes
SRR11948717	rehab	B1	0	0	yes
SRR11948722	rehab	A	0	0	yes
SRR11948728	rehab	B1	1	0	yes
SRR11948729	rehab	D	6	0	yes
SRR11948731	rehab	E	1	0	no
SRR11948732	rehab	B1	1	0	yes
SRR11948733	rehab	A	0	0	no
SRR11948734	rehab	E	1	0	no
SRR11948735	rehab	E	1	0	yes
SRR11948736	rehab	A	0	0	yes
SRR11948737	rehab	E	1	0	no
SRR11948738	rehab	A	0	0	yes
SRR11948741	rehab	A	1	0	yes
SRR11948742	rehab	C	1	0	no
SRR11948743	rehab	A	0	0	yes
SRR11948744	rehab	A	1	0	no
SRR11948745	rehab	A	1	0	yes
SRR11948746	rehab	A	2	0	yes
SRR11948748	rehab	E	3	0	yes
SRR11948749	rehab	B1	0	0	no
SRR11948751	rehab	E	1	0	yes
SRR11948752	rehab	A	0	0	yes
SRR11948754	rehab	B1	0	0	no
SRR11948756	rehab	B1	0	0	yes
SRR11948757	rehab	A	1	0	yes
SRR11948758	rehab	A	0	0	yes
SRR11948759	rehab	E	2	0	yes
SRR11948762	rehab	B1	1	0	yes
SRR11948763	rehab	F	5	0	yes
SRR11948764	rehab	E	2	0	yes
SRR11948765	rehab	B1	1	0	no
SRR11948766	rehab	B1	0	0	yes
SRR11948767	rehab	B2	5	0	yes
SRR11948768	rehab	cladeV	39	1	no
SRR11948769	rehab	B1	1	0	yes
SRR11948770	rehab	B1	1	0	yes
SRR11948771	rehab	A	1	0	no
SRR11948772	rehab	E	2	0	yes
SRR11948776	rehab	B2	5	0	no
SRR11948778	rehab	B1	0	0	yes
SRR11948781	rehab	B1	0	0	no
SRR11948783	rehab	B2	4	0	no
SRR11948784	rehab	B2	4	0	no
SRR11948786	rehab	B2	7	0	yes
SRR11948789	rehab	A	1	0	yes
SRR11948792	rehab	B1	0	0	yes
SRR11948798	rehab	B2	7	0	yes
SRR11948800	rehab	B2	5	0	yes
SRR11948801	rehab	B1	0	0	yes
SRR11948802	rehab	B1	0	0	yes
SRR11948810	rehab	A	1	0	yes
SRR11948812	rehab	B1	1	0	yes
SRR11948813	rehab	B1	0	0	no
SRR11948817	rehab	B1	0	0	yes
SRR11948818	rehab	A	1	0	no
SRR11948819	rehab	B1	0	0	yes
SRR11948820	rehab	E	5	0	yes
SRR11948821	rehab	E	1	0	yes
SRR11948822	rehab	B1	0	0	yes
SRR11948823	rehab	B1	1	0	yes
SRR11948828	rehab	B1	0	0	yes
SRR11948829	rehab	B1	0	0	yes
SRR11948830	rehab	B1	0	0	no
SRR11948831	rehab	B1	3	0	yes
SRR11948832	rehab	B1	0	0	yes
SRR11948833	rehab	E	2	0	yes
SRR11948834	rehab	B1	2	0	no
SRR11948835	rehab	E	2	0	no
SRR11948836	rehab	B1	0	0	no
SRR11948837	rehab	B1	0	0	no
SRR11948838	rehab	B2	5	0	yes
SRR11948840	rehab	E	1	0	yes
SRR11948841	rehab	B1	0	0	yes
SRR11948842	rehab	B1	0	0	yes
SRR11948843	rehab	A	0	0	yes
SRR11948844	rehab	B1	1	0	yes
SRR11948845	rehab	A	0	0	yes
SRR11948846	rehab	B1	1	0	yes
SRR11948847	rehab	B1	0	0	yes
SRR11948848	rehab	B1	2	0	yes
SRR11948849	rehab	B1	0	0	no
SRR11948850	rehab	A	1	0	yes
SRR11948851	rehab	E	2	0	yes
SRR11948852	rehab	A	0	0	no
SRR11948856	rehab	Unknown	2	0	no
SRR11948858	rehab	Unknown	2	0	no
SRR11948860	rehab	E	1	0	yes
SRR11948861	rehab	A	0	0	yes
SRR11948862	rehab	B1	0	0	yes
SRR11948863	rehab	A	0	0	no
SRR11948864	rehab	E	2	0	yes
SRR11948868	rehab	B1	0	0	yes
SRR11948869	rehab	A	1	0	yes
SRR11948871	rehab	A	0	0	yes
SRR11948872	rehab	B2	4	0	yes
SRR11948874	rehab	cladeV	40	1	no
SRR11948877	rehab	G	6	0	yes
SRR11948878	rehab	A	0	0	yes
SRR11948879	rehab	B1	0	0	no
SRR11948880	rehab	B2	10	0	yes
SRR11948881	rehab	B2	8	0	yes
SRR11948883	rehab	B2	12	0	yes
SRR11948884	rehab	B2	9	0	yes
SRR11948885	rehab	A	1	0	no
SRR11948886	rehab	B1	2	0	no
SRR11948893	rehab	B2	5	0	yes
SRR11948894	rehab	B1	0	0	yes
SRR11948895	rehab	A	3	0	yes
SRR11948898	rehab	A	2	0	yes
SRR11948900	rehab	B1	1	0	yes
SRR11948901	rehab	B1	2	0	yes
SRR11948906	rehab	B2	10	0	yes
SRR11948912	rehab	B1	2	0	yes
SRR11948916	rehab	A	1	0	yes
SRR11948918	rehab	B1	0	0	no
SRR11948919	rehab	B1	0	0	yes
SRR11948923	rehab	A	2	0	yes
SRR11948927	rehab	A	0	0	yes
SRR11948929	rehab	D	6	0	yes
SRR11948930	rehab	F	35	0	no
SRR11948931	rehab	B1	0	0	yes
SRR11948932	rehab	B1	0	0	no
SRR11948933	rehab	Unknown	36	0	no
SRR11948934	rehab	A	1	0	yes
SRR11948935	rehab	E	3	0	yes
SRR11948936	rehab	A	1	0	yes
SRR11948937	rehab	A	0	0	yes
SRR11948938	rehab	A	0	0	yes
SRR11948940	rehab	B1	0	0	yes
SRR11948941	rehab	B1	0	0	no
SRR11948942	rehab	A	1	0	yes
SRR11948943	rehab	B2	9	0	yes
SRR11948946	rehab	A	1	0	yes
SRR11948948	rehab	B1	0	0	yes
SRR11948951	rehab	A	1	0	no
SRR11948952	rehab	A	0	0	yes
SRR11948953	rehab	A	0	0	yes
SRR11948954	rehab	B2	5	0	yes
SRR11948955	rehab	B2	5	0	no
SRR11948956	rehab	E	1	0	no
SRR11948957	rehab	A	0	0	yes
SRR11948958	rehab	B2	5	0	no
SRR11948959	rehab	A	0	0	yes
SRR11948960	rehab	A	0	0	yes
SRR11948961	rehab	B2	5	0	no
SRR11948962	rehab	B2	5	0	no
SRR11948963	rehab	B2	5	0	no
SRR11948964	rehab	B1	0	0	yes
SRR11948965	rehab	A	0	0	no
SRR11948967	rehab	A	0	0	no
SRR11948968	rehab	A	0	0	yes
SRR11948971	rehab	B1	0	0	yes
SRR11948972	rehab	E	2	0	yes
SRR11948973	rehab	A	2	0	yes
SRR11948974	rehab	D	7	0	yes
SRR11948975	rehab	B1	0	0	yes
SRR11948976	rehab	A	2	0	yes
SRR11948978	rehab	D	7	0	yes
SRR11948980	rehab	B1	0	0	no
SRR11948981	rehab	E	1	0	yes
SRR11948983	rehab	E	0	0	yes
SRR11948984	rehab	B1	0	0	yes
SRR11948985	rehab	A	1	0	yes
SRR11948986	rehab	E	0	0	no
SRR11948987	rehab	B1	0	0	yes
SRR11948988	rehab	B1	0	0	yes
SRR11948989	rehab	A	1	0	yes
SRR11948990	rehab	A	1	0	no
SRR11948991	rehab	B1	1	0	yes
SRR11948992	rehab	A	0	0	no
SRR11948994	rehab	B1	0	0	yes
SRR11948995	rehab	B1	2	0	yes
SRR11948996	rehab	B1	2	0	no
SRR11948997	rehab	B1	0	0	no
SRR11948998	rehab	B2	10	0	yes
SRR11948999	rehab	B1	0	0	yes
SRR11949001	rehab	B2	7	0	yes
SRR11949007	rehab	B1	0	0	yes
SRR11949010	rehab	B1	0	0	yes
SRR11949016	rehab	B2	9	0	yes
SRR11949018	rehab	D	6	0	yes
SRR11949019	rehab	B1	0	0	no
SRR11949020	rehab	B2	5	0	yes
SRR11949021	rehab	B2	4	0	yes
SRR11949025	rehab	B1	0	0	yes
SRR11949026	rehab	B2	5	0	yes
SRR11949027	rehab	B1	2	0	yes
SRR11949028	rehab	B1	0	0	yes
SRR11949030	rehab	B1	0	0	no
SRR11949036	rehab	A	1	0	no
SRR11949038	rehab	B1	1	0	no
SRR11949039	rehab	B2	5	0	yes
SRR11949040	rehab	B1	1	0	no
SRR11949041	rehab	B1	1	0	no
SRR11949042	rehab	E	1	0	yes
SRR11949043	rehab	B1	1	0	no
SRR11949044	rehab	B1	1	0	yes
SRR11949045	rehab	B2	5	0	no
SRR11949047	rehab	A	0	0	no
SRR11949048	rehab	A	0	0	yes
SRR11949049	rehab	A	0	0	no
SRR11949050	rehab	A	0	0	yes
SRR11949051	rehab	A	0	0	no
SRR11949052	rehab	A	0	0	yes
SRR11949054	rehab	A	0	0	no
SRR11949055	rehab	A	0	0	no
SRR11949056	rehab	B1	0	0	yes
SRR11949057	rehab	B1	0	0	yes
SRR11949058	rehab	E	0	0	yes
SRR11949059	rehab	B1	0	0	yes
SRR11949060	rehab	Unknown	3	1	no
SRR11949061	rehab	B1	0	0	yes
SRR11949062	rehab	B1	2	0	yes
SRR11949063	rehab	B1	2	0	yes
SRR11949064	rehab	B1	0	0	no
SRR11949065	rehab	D	6	0	no
SRR11949069	rehab	E or cladeI	2	0	no
SRR11949070	rehab	B1	0	0	yes
SRR11949071	rehab	B1	0	0	no
SRR11949072	rehab	A	0	0	no
SRR11949073	rehab	D	6	0	yes
SRR11949074	rehab	B1	0	0	no
SRR11949075	rehab	B1	0	0	yes
SRR11949077	rehab	B1	0	0	yes
SRR11949078	rehab	B1	0	0	yes
SRR11949079	rehab	B1	0	0	no
SRR11949080	rehab	B1	0	0	no
SRR11949081	rehab	D	6	0	yes
SRR11949083	rehab	cladeII	36	0	no
SRR11949084	rehab	A	1	0	yes
SRR11949086	rehab	B2	5	0	yes
SRR11949090	rehab	B1	0	0	yes
SRR11949092	rehab	cladeV	39	1	no
SRR11949093	rehab	cladeV	39	1	no
SRR11949099	rehab	C	1	0	yes
SRR11949100	rehab	E	0	0	yes
SRR11949101	rehab	B1	0	0	yes
SRR11949102	rehab	A	0	0	yes
SRR11949103	rehab	G	6	0	yes
SRR11949104	rehab	B1	0	0	yes
SRR11949105	rehab	A	0	0	no
SRR11949106	rehab	E	1	0	yes
SRR11949107	rehab	E	3	0	no
SRR11949108	rehab	D	2	0	yes
SRR11949109	rehab	E	3	0	yes
SRR11949111	rehab	B1	0	0	no
SRR11949112	rehab	B1	0	0	yes
SRR11949113	rehab	F	5	0	yes
SRR11949114	rehab	B2	7	0	yes
SRR11949115	rehab	B1	0	0	yes
SRR11949116	rehab	B1	0	0	yes
SRR11949117	rehab	B1	0	0	no
SRR11949118	rehab	B1	0	0	yes
SRR11949119	rehab	D	2	0	yes
SRR11949120	rehab	B1	0	0	yes
SRR11949121	rehab	B1	2	0	yes
SRR11949122	rehab	E	2	0	no
SRR11949123	rehab	E	2	0	no
SRR11949124	rehab	E	1	0	yes
SRR11949125	rehab	B1	0	0	no
SRR11949126	rehab	A	1	0	no
SRR11949127	rehab	B1	1	0	yes
SRR11949128	rehab	B1	1	0	yes
SRR11949129	rehab	B1	1	0	yes
SRR11949130	rehab	E	2	0	no
SRR11949131	rehab	E	2	0	yes
SRR11949132	rehab	B2	5	0	no
SRR11949134	rehab	B2	4	0	yes
SRR11949136	rehab	B1	1	0	yes
SRR11949138	rehab	E	2	0	yes
SRR11949141	rehab	D	6	0	no
SRR11949143	rehab	B1	0	0	yes
SRR11949145	rehab	B1	1	0	yes
SRR11949149	rehab	E	3	0	yes
SRR11949150	rehab	cladeV	40	1	no
SRR11949151	rehab	G	6	0	yes
SRR11949152	rehab	D	6	0	yes
SRR11949155	rehab	B1	0	0	yes
SRR11949159	rehab	B1	0	0	yes
SRR11949160	rehab	A	1	0	yes
SRR11949161	rehab	A	1	0	yes
SRR11949162	rehab	A	3	1	yes
SRR11949163	rehab	A	1	0	no
SRR11949164	rehab	A	1	0	no
SRR11949165	rehab	A	1	0	yes
SRR11949170	rehab	D	6	0	yes
SRR11949174	rehab	A	0	0	yes
SRR11949176	rehab	B1	0	0	no
SRR11949177	rehab	A	3	0	yes
SRR11949178	rehab	F	6	0	yes
SRR11949181	rehab	B1	1	0	yes
SRR11949182	rehab	B1	0	0	yes
SRR11949183	rehab	B1	0	0	yes
SRR11949184	rehab	B1	0	0	yes
SRR11949185	rehab	B2	6	1	yes
SRR11949186	rehab	A	0	0	yes
SRR11949187	rehab	B1	0	0	yes
SRR11949188	rehab	A	2	0	no
SRR11949189	rehab	A	2	0	yes
SRR11949190	rehab	B1	2	0	yes
SRR11949194	rehab	B1	2	0	yes
SRR11949195	rehab	B1	2	0	yes
SRR11949196	rehab	B1	0	0	yes
SRR11949197	rehab	A	1	0	yes
SRR11949198	rehab	A	0	0	yes
SRR11949200	rehab	A	0	0	yes
SRR11949201	rehab	A	2	0	no
SRR11949202	rehab	A	2	0	yes
SRR11949203	rehab	B1	0	0	yes
SRR11949204	rehab	A	1	0	yes
SRR11949205	rehab	A	0	0	no
SRR11949206	rehab	A	0	0	yes
SRR11949208	rehab	A	0	0	no
SRR11949209	rehab	A	0	0	no
SRR11949210	rehab	A	1	0	yes
SRR11949211	rehab	A	1	0	no
SRR11949213	rehab	B1	0	0	no
SRR11949214	rehab	B1	0	0	yes
SRR11949215	rehab	B1	1	0	yes
SRR11949216	rehab	A	1	0	yes
SRR11949217	rehab	B1	0	0	yes
SRR11949218	rehab	A	0	0	yes
SRR11949219	rehab	B1	0	0	no
SRR11949220	rehab	B1	1	0	yes
SRR11949221	rehab	A	0	0	no
SRR11949222	rehab	B1	0	0	no
SRR11949223	rehab	B2	5	0	yes
SRR11949226	rehab	E	1	0	yes
SRR11949227	rehab	A	1	0	yes
SRR11949228	rehab	B1	2	0	no
SRR11949230	rehab	B1	1	0	no
SRR11949232	rehab	cladeV	40	1	no
SRR11949233	rehab	cladeV	40	1	no
SRR11949234	rehab	B1	0	0	yes
SRR11949239	rehab	B1	0	0	no
SRR11949241	rehab	A	3	0	yes
SRR11949244	rehab	A	0	0	yes
SRR11949245	rehab	B2	9	0	yes
SRR11949248	rehab	B2	4	0	yes
SRR11949251	rehab	B2	12	0	yes
SRR11949252	rehab	A	1	0	yes
SRR11949256	rehab	B2	4	0	yes
SRR11949263	rehab	A	1	0	yes
SRR11949265	rehab	B2	4	0	yes
SRR11949269	rehab	B1	0	0	no
SRR11949272	rehab	B2	8	0	yes
SRR11949276	rehab	B2	4	0	no
SRR11949277	rehab	B1	2	0	yes
SRR11949278	rehab	B1	0	0	yes
SRR11949279	rehab	B1	0	0	yes
SRR11949280	rehab	B1	0	0	no
SRR11949281	rehab	B1	1	0	yes
SRR11949283	rehab	E	1	0	yes
SRR11949284	rehab	B1	0	0	yes
SRR11949285	rehab	B1	0	0	yes
SRR11949289	rehab	B1	0	0	yes
SRR11949290	rehab	Unknown	35	0	no
SRR11949291	rehab	F	35	0	no
SRR11949292	rehab	D	6	0	yes
SRR11949300	rehab	B1	0	0	no
SRR11949302	rehab	A	3	0	yes
SRR11949304	rehab	B2	10	0	yes
SRR11949305	rehab	A	1	0	yes
SRR11949308	rehab	B2	9	0	yes
SRR11949312	rehab	B1	0	0	yes
SRR11949316	rehab	A	1	0	yes
SRR11949317	rehab	B1	0	0	no
SRR11949319	rehab	B2	4	0	yes
SRR11949322	rehab	B1	1	0	no
SRR11949326	rehab	B1	0	0	no
SRR11949328	rehab	C	1	0	yes
SRR11949329	rehab	B1	0	0	yes
SRR11949330	rehab	A	0	0	yes
SRR11949331	rehab	B1	1	0	yes
SRR11949332	rehab	A	0	0	yes
SRR11949334	rehab	A	0	0	yes
SRR11949335	rehab	A	0	0	yes
SRR11949336	rehab	D	6	0	yes
SRR11949338	rehab	D	6	0	no
SRR11949340	rehab	D	6	0	yes
SRR11949341	rehab	B2	10	0	yes
SRR11949344	rehab	B2	8	0	yes
SRR11949347	rehab	B1	0	0	yes
SRR11949348	rehab	B1	0	0	no
SRR11949349	rehab	B1	3	0	yes
SRR11949355	rehab	B2	9	0	yes
SRR11949356	rehab	B1	0	0	yes
SRR11949357	rehab	B1	0	0	yes
SRR11949358	rehab	E	1	0	yes
SRR11949364	rehab	B1	0	0	yes
SRR11949365	rehab	E	2	0	no
SRR11949367	rehab	B1	0	0	yes
SRR11949368	rehab	B1	0	0	yes
SRR11949369	rehab	B1	1	0	yes
SRR11949370	rehab	A	1	0	yes
SRR11949371	rehab	B1	0	0	yes
SRR11949372	rehab	D	6	0	yes
SRR11949374	rehab	B1	0	0	yes
SRR11949375	rehab	B1	1	0	yes
SRR11949376	rehab	B1	0	0	no
SRR11949377	rehab	B2	5	0	yes
SRR11949378	rehab	A	0	0	yes
SRR11949380	rehab	C	1	0	yes
SRR11949384	rehab	B1	0	0	yes
SRR11949385	rehab	B2	5	0	no
SRR11949386	rehab	B1	0	0	yes
SRR11949387	rehab	A	1	0	yes
SRR11949388	rehab	D	6	0	yes
SRR11949389	rehab	A	2	0	yes
SRR11949390	rehab	B2	5	0	yes
SRR11949391	rehab	B2	5	0	yes
SRR11949393	rehab	A	2	0	yes
SRR11949394	rehab	A	1	0	yes
SRR11949395	rehab	E	0	0	yes
SRR11949396	rehab	A	0	0	yes
SRR11949398	rehab	A	2	0	yes
SRR11949399	rehab	A	1	0	no
SRR11949400	rehab	A	1	0	yes
SRR11949401	rehab	A	1	0	no
SRR11949402	rehab	G	6	0	yes
SRR11949403	rehab	A	0	0	yes
SRR11949404	rehab	A	1	0	yes
SRR11949406	rehab	A	1	0	yes
SRR11949407	rehab	B1	2	0	yes
SRR11949411	rehab	E	0	0	yes
SRR11949412	rehab	B1	1	0	yes
SRR11949413	rehab	E	3	0	yes
SRR11949414	rehab	B1	0	0	yes
SRR11949415	rehab	B1	0	0	yes
SRR11949416	rehab	D	8	0	yes
SRR11949418	rehab	A	1	0	yes
SRR11949421	rehab	B1	0	0	no
SRR11949422	rehab	B1	0	0	yes
SRR11949423	rehab	B1	0	0	yes
SRR11949424	rehab	B1	0	0	yes
SRR11949425	rehab	E	2	0	no
SRR11949426	rehab	A	1	0	yes
SRR11949427	rehab	B1	0	0	yes
SRR11949428	rehab	cladeI	6	0	no
SRR11949429	rehab	E	2	0	no
SRR11949430	rehab	cladeI	6	0	no
SRR11949431	rehab	B2	10	0	yes
SRR11949432	rehab	A	1	0	yes
SRR11949433	rehab	E	2	0	no
SRR11949434	rehab	A	1	0	yes
SRR11949435	rehab	B1	0	0	yes
SRR11949437	rehab	E	2	0	yes
SRR11949438	rehab	B1	0	0	no
SRR11949447	rehab	B2	5	0	yes
SRR11949448	rehab	C	1	0	yes
SRR11949449	rehab	cladeV	38	1	no
SRR11949453	rehab	D	6	0	yes
SRR11949456	rehab	F	5	0	yes
SRR10271458	davies	B2	9	0	yes
SRR10271459	davies	F	5	0	yes
SRR10271460	davies	C	1	0	yes
SRR10271461	davies	B2	4	0	yes
SRR10271462	davies	B2	7	0	yes
SRR10271463	davies	B2	9	0	no
SRR10271464	davies	B2	4	0	yes
SRR10271465	davies	B2	8	0	yes
SRR10271466	davies	A	3	0	yes
SRR10271467	davies	D	6	0	yes
SRR10271468	davies	B2	10	0	no
SRR10271469	davies	B2	9	0	yes
SRR10271470	davies	A	2	0	yes
SRR10271471	davies	B2	10	0	yes
SRR10271472	davies	B2	9	0	yes
SRR10271473	davies	B2	7	0	yes
SRR10271474	davies	B1	1	0	yes
SRR10271475	davies	B2	10	0	yes
SRR10271476	davies	B2	4	0	yes
SRR10271477	davies	F	5	0	yes
SRR10271478	davies	A	1	0	yes
SRR10271479	davies	C	1	0	yes
SRR10271480	davies	B2	4	0	yes
SRR10271481	davies	B2	10	0	yes
SRR10271482	davies	B1	0	0	yes
SRR10271483	davies	D	6	0	yes
SRR10271484	davies	B2	5	0	yes
SRR10271485	davies	B2	4	0	yes
SRR10271486	davies	B2	7	0	yes
SRR10271487	davies	B2	4	0	yes
SRR10271488	davies	A	1	0	yes
SRR10271489	davies	D	6	0	yes
SRR10271490	davies	D	6	0	yes
SRR10271491	davies	B2	9	0	yes
SRR10271492	davies	B2	9	0	yes
SRR10271493	davies	B2	10	0	yes
SRR10271494	davies	B2	10	0	yes
SRR10271495	davies	B2	4	0	yes
SRR10271496	davies	F	5	0	yes
SRR10271497	davies	B2	4	0	yes
SRR10271498	davies	B2	10	1	yes
SRR10271499	davies	B2	9	0	yes
SRR10271500	davies	B2	9	0	yes
SRR10271501	davies	B2	9	0	yes
SRR10271502	davies	D	6	0	yes
SRR10271503	davies	B2	8	0	yes
SRR10271504	davies	B2	4	0	yes
SRR10271505	davies	B2	9	0	yes
SRR10271506	davies	B2	4	0	yes
SRR10271507	davies	D	6	0	yes
SRR10271508	davies	B2	4	0	yes
SRR10271509	davies	B2	10	0	yes
SRR10271510	davies	C	1	0	yes
SRR10271511	davies	A	0	0	yes
SRR10271512	davies	B2	7	0	yes
SRR10271513	davies	B2	9	0	yes
SRR10271514	davies	B2	5	0	yes
SRR10271515	davies	B2	5	0	yes
SRR10271516	davies	B2	10	0	yes
SRR10271517	davies	B2	4	0	yes
SRR10271518	davies	G	6	0	yes
SRR10271519	davies	B2	5	0	yes
SRR10271520	davies	C	1	0	yes
SRR10271521	davies	B2	5	0	yes
SRR10271522	davies	B2	9	0	no
SRR10271523	davies	B2	7	0	yes
SRR10271524	davies	B2	11	0	yes
SRR10271525	davies	D	6	0	yes
SRR10271526	davies	D	6	0	yes
SRR10271527	davies	B1	0	0	yes
SRR10271528	davies	B2	11	0	yes
SRR10271529	davies	A	1	0	yes
SRR10271530	davies	B2	8	1	yes
SRR10271531	davies	B2	5	0	yes
SRR10271532	davies	B2	4	0	yes
SRR10271533	davies	B2	9	0	yes
SRR10271534	davies	cladeI	10	0	no
SRR10271535	davies	C	1	0	yes
SRR10271536	davies	A	0	0	yes
SRR10271537	davies	B2	8	0	yes
SRR10271538	davies	B2	9	0	yes
SRR10271539	davies	A	0	0	yes
SRR10271540	davies	B2	8	0	yes
SRR10271541	davies	B1	0	0	yes
SRR10271542	davies	D	6	0	yes
SRR10271543	davies	B2	5	0	yes
SRR10271544	davies	B2	9	0	yes
SRR10271545	davies	B2	11	0	yes
SRR10271546	davies	B2	4	0	yes
SRR10271547	davies	F	6	0	yes
SRR10271548	davies	B2	5	0	yes
SRR10271549	davies	B2	10	0	yes
SRR10271550	davies	B2	5	0	yes
SRR10271551	davies	D	6	0	yes
SRR10271552	davies	B2	10	0	yes
SRR10271553	davies	A	1	0	yes
SRR10271554	davies	D	6	0	yes
SRR10271555	davies	B1	0	0	yes
SRR10271556	davies	B2	4	0	yes
SRR10271557	davies	B2	4	0	yes
SRR10271558	davies	A	1	0	yes
SRR10271559	davies	B2	6	0	yes
SRR10271560	davies	D	6	0	yes
SRR10271561	davies	B2	6	1	yes
SRR10271562	davies	B1	0	0	yes
SRR10271563	davies	B2	8	0	yes
SRR10271564	davies	B2	9	0	yes
SRR10271565	davies	A	1	0	yes
SRR10271566	davies	B2	9	0	yes
SRR10271567	davies	D	6	0	yes
SRR10271568	davies	C	1	0	yes
SRR10271569	davies	B2	9	0	yes
SRR10271570	davies	D	6	0	yes
SRR10271571	davies	B2	9	0	yes
SRR10271572	davies	B2	10	0	yes
SRR10271573	davies	B1	0	0	yes
SRR10271574	davies	B2	9	0	yes
SRR10271575	davies	A	1	0	yes
SRR10271576	davies	A	0	0	yes
SRR10271577	davies	B2	10	0	yes
SRR10271578	davies	B2	10	1	yes
SRR10271579	davies	B2	9	0	yes
SRR10271580	davies	B2	10	0	yes
SRR10271581	davies	B2	10	0	yes
SRR10271582	davies	A	0	0	yes
SRR10271583	davies	B2	10	0	yes
SRR10271584	davies	B2	9	0	yes
SRR10271585	davies	B2	5	0	yes
SRR10271586	davies	B2	7	0	yes
SRR10271587	davies	B2	4	0	yes
SRR10271588	davies	D	6	0	yes
SRR10271589	davies	B2	4	0	yes
SRR10271590	davies	B2	10	0	yes
SRR10271591	davies	B2	5	0	yes
SRR10271592	davies	A	0	0	yes
SRR10271593	davies	F	5	0	no
SRR10271594	davies	D	6	0	yes
SRR10271595	davies	B2	4	0	yes
SRR10271596	davies	D	6	0	yes
SRR10271597	davies	B2	10	0	yes
SRR10271598	davies	B2	9	0	yes
SRR10271599	davies	D	6	0	yes
SRR10271600	davies	B2	5	0	yes
SRR10271601	davies	D	6	0	yes
SRR10271602	davies	B2	5	0	yes
SRR10271603	davies	B2	4	0	no
SRR10271604	davies	D	6	0	yes
SRR10271605	davies	B2	7	0	yes
SRR10271606	davies	B2	7	0	yes
SRR10271607	davies	A	0	0	yes
SRR10271608	davies	B2	5	0	yes
SRR10271609	davies	B2	8	1	yes
SRR10271610	davies	B2	7	0	yes
SRR10271611	davies	D	6	0	yes
SRR10271612	davies	B2	11	0	no
SRR10271613	davies	B1	0	0	yes
SRR10271614	davies	F	7	0	yes
SRR10271615	davies	B2	9	0	yes
SRR10271616	davies	B2	10	0	yes
SRR10271617	davies	B2	9	0	yes
SRR10271618	davies	A	1	0	yes
SRR10271619	davies	D	6	0	yes
SRR10271620	davies	D	6	0	yes
SRR10271621	davies	B2	4	0	yes
SRR10271622	davies	B2	4	0	yes
SRR10271623	davies	B2	4	0	yes
SRR10271624	davies	B2	5	0	yes
SRR10271625	davies	B2	9	0	yes
SRR10271626	davies	B2	8	0	yes
SRR10271627	davies	D	6	0	yes
SRR10271628	davies	B2	4	0	yes
SRR10271629	davies	B2	9	0	yes
SRR10271630	davies	B2	4	0	yes
SRR10271631	davies	B2	9	0	yes
SRR10271632	davies	D	6	0	yes
SRR10271633	davies	B2	4	0	yes
SRR10271634	davies	B2	10	0	yes
SRR10271635	davies	B2	10	0	yes
SRR10271636	davies	B2	5	0	yes
SRR10271637	davies	B2	8	1	yes
SRR10271638	davies	B1	0	0	yes
SRR10271639	davies	B2	9	0	no
SRR10271640	davies	B2	7	0	yes
SRR10271641	davies	B2	10	0	yes
SRR10271642	davies	D	6	0	yes
SRR10271643	davies	B2	9	0	yes
SRR10271644	davies	B2	6	1	yes
SRR10271645	davies	B2	9	0	yes
SRR10271646	davies	D	6	0	yes
SRR10271647	davies	B2	10	0	yes
SRR10271648	davies	C	2	0	yes
SRR10271649	davies	B2	10	0	yes
SRR10271650	davies	A	0	0	yes
SRR10271651	davies	B2	10	0	yes
SRR10271652	davies	B2	5	0	yes
SRR10271653	davies	G	6	0	yes
SRR10271654	davies	B2	10	0	yes
SRR10271655	davies	B2	10	0	yes
SRR10271656	davies	B1	0	0	yes
SRR10271657	davies	C	1	0	yes
SRR10271658	davies	B2	9	0	yes
SRR10271659	davies	B2	12	0	yes
SRR10271660	davies	B2	4	0	yes
SRR10271661	davies	B2	9	0	yes
SRR10271662	davies	B2	7	0	yes
SRR10271663	davies	B2	10	0	yes
SRR10271664	davies	B2	10	0	yes
SRR10271665	davies	B2	9	0	yes
SRR10271666	davies	B2	10	0	yes
SRR10271667	davies	B2	8	0	yes
SRR10271668	davies	B2	7	0	yes
SRR10271669	davies	B2	9	0	yes
SRR10271670	davies	B2	5	0	yes
SRR10271671	davies	B2	10	1	yes
SRR10271672	davies	F	6	0	yes
SRR10271673	davies	B2	9	0	yes
SRR10271674	davies	D	6	0	yes
SRR10271675	davies	B2	4	0	yes
SRR10271676	davies	B2	4	0	yes
SRR10271677	davies	B2	9	0	yes
SRR10271678	davies	A	1	0	yes
SRR10271679	davies	B2	7	0	yes
SRR10271680	davies	B2	10	0	yes
SRR10271681	davies	B2	4	0	no
SRR10271682	davies	B2	10	0	yes
SRR10271683	davies	B2	9	0	yes
SRR10271684	davies	B2	10	0	yes
SRR10271685	davies	B2	9	0	yes
SRR10271686	davies	F	5	0	yes
SRR10271687	davies	A	0	0	yes
SRR10271688	davies	B2	5	0	yes
SRR10271689	davies	B2	4	0	yes
SRR10271690	davies	C	1	0	yes
SRR10271691	davies	B2	5	0	yes
SRR10271692	davies	B2	8	0	yes
SRR10271693	davies	B2	9	0	yes
SRR10271694	davies	D	6	0	yes
SRR10271695	davies	D	6	0	yes
SRR10271696	davies	D	46	5	no
SRR10271697	davies	B2	10	0	yes
SRR10271698	davies	B2	5	0	yes
SRR10271699	davies	B2	10	0	no
SRR10271700	davies	B2	9	0	yes
SRR10271701	davies	B2	5	0	yes
SRR10271702	davies	C	1	0	yes
SRR10271703	davies	B2	10	0	yes
SRR10271704	davies	D	6	0	yes
SRR10271705	davies	A	0	0	yes
SRR10271706	davies	G	6	0	yes
SRR10271707	davies	F	9	1	yes
SRR10271708	davies	B2	5	0	yes
SRR10271709	davies	B2	9	0	yes
SRR10271710	davies	B2	9	0	yes
SRR10271711	davies	B2	9	0	yes
SRR10271712	davies	B2	9	0	yes
SRR10271713	davies	B2	10	0	yes
SRR10271714	davies	D	6	0	yes
SRR10271715	davies	B2	10	0	yes
SRR10271716	davies	D	6	0	yes
SRR10271717	davies	C	1	0	yes
SRR10271718	davies	B2	10	0	yes
SRR10271719	davies	D	6	0	yes
SRR10271720	davies	A	0	0	yes
SRR10271721	davies	A	1	0	yes
SRR10271722	davies	B2	10	0	no
SRR10271723	davies	B1	1	0	yes
SRR10271724	davies	E or cladeI	6	0	no
SRR10271725	davies	A	0	0	yes
SRR10271726	davies	D	6	0	yes
SRR10271727	davies	F	5	0	yes
SRR10271728	davies	C	1	0	yes
SRR10271729	davies	B2	8	0	yes
SRR10271730	davies	B2	4	0	yes
SRR10271731	davies	B2	9	0	yes
SRR10271732	davies	B2	10	0	yes
SRR10271733	davies	D	6	0	yes
SRR10271734	davies	B2	7	0	yes
SRR10271735	davies	B2	9	0	yes
SRR10271736	davies	D	6	0	yes
SRR10271737	davies	B2	4	0	yes
SRR10271738	davies	B2	10	0	yes
SRR10271739	davies	B2	8	0	yes
SRR10271740	davies	B2	9	0	yes
SRR10271741	davies	D	6	0	yes
SRR10271742	davies	B2	10	0	yes
SRR10271743	davies	C	1	0	yes
SRR10271744	davies	D	6	0	yes
SRR10271745	davies	B2	9	0	yes
SRR10271746	davies	B2	10	0	yes
SRR10271747	davies	B2	10	0	yes
SRR10271748	davies	B2	10	1	yes
SRR10271749	davies	B2	5	0	yes
SRR10271750	davies	B2	5	0	yes
SRR10271751	davies	B2	8	0	yes
SRR10271752	davies	C	1	0	yes
SRR10271753	davies	B2	4	0	yes
SRR10271754	davies	B2	7	0	yes
SRR10271755	davies	B2	10	0	no
SRR10271756	davies	B2	7	0	yes
SRR10271757	davies	B2	4	0	yes
SRR10271758	davies	D	6	0	yes
SRR10271759	davies	A	0	0	yes
SRR10271760	davies	D	6	0	yes
SRR10271761	davies	D	6	0	yes
SRR10271762	davies	D	6	0	yes
SRR10271763	davies	B2	4	0	yes
SRR10271764	davies	D	5	0	yes
SRR10271765	davies	A	0	0	yes
SRR10271766	davies	D	6	0	yes
SRR10271767	davies	C	1	0	yes
SRR10271768	davies	B2	9	0	yes
SRR10271769	davies	B2	5	0	yes
SRR10271770	davies	B2	9	0	yes
SRR10271771	davies	B2	4	0	yes
SRR10271772	davies	B2	7	0	yes
SRR10271773	davies	D	6	0	no
SRR10271774	davies	B2	10	0	yes
SRR10271775	davies	D	6	0	yes
SRR10271776	davies	D	6	0	yes
SRR10271777	davies	B2	10	0	yes
SRR10271778	davies	B2	9	0	yes
SRR10271779	davies	B2	10	0	yes
SRR10271780	davies	B2	9	0	yes
SRR10271781	davies	B2	5	0	yes
SRR10271782	davies	B2	7	0	yes
SRR10271783	davies	B2	5	0	yes
SRR10271784	davies	B2	10	0	yes
SRR10271785	davies	B2	10	0	yes
SRR10271786	davies	B2	10	0	yes
SRR10271787	davies	B2	10	0	yes
SRR10271788	davies	B2	9	0	yes
SRR10271789	davies	B2	8	0	yes
SRR10271790	davies	D	6	0	yes
SRR10271791	davies	B2	7	0	yes
SRR10271792	davies	B1	0	0	yes
SRR10271793	davies	B2	4	0	yes
SRR10271794	davies	B2	10	0	yes
SRR10271795	davies	F	6	0	yes
SRR10271796	davies	B2	10	0	no
SRR10271797	davies	B2	5	0	yes
SRR10271798	davies	A	1	0	yes
SRR10271799	davies	B2	9	0	yes
SRR10271800	davies	G	6	0	yes
SRR10271801	davies	D	6	0	yes
SRR10271802	davies	B1	0	0	yes
SRR10271803	davies	B2	9	0	yes
SRR10271804	davies	B2	4	0	yes
SRR10271805	davies	B2	10	0	yes
SRR10271806	davies	B2	10	0	yes
SRR10271807	davies	A	3	0	yes
SRR10271808	davies	B2	9	0	yes
SRR10271809	davies	B2	5	0	yes
SRR10271810	davies	B2	10	0	yes
SRR10271811	davies	D	6	0	no
SRR10271812	davies	B2	10	0	yes
SRR10271813	davies	B2	5	0	yes
SRR10271814	davies	B2	8	0	no
SRR10271815	davies	A	0	0	yes
SRR10271816	davies	B2	4	0	yes
SRR10271817	davies	C	2	0	yes
SRR10271818	davies	B2	4	0	yes
SRR10271819	davies	B2	10	0	yes
SRR10271820	davies	B2	5	0	yes
SRR10271821	davies	B2	12	0	yes
SRR10271822	davies	B2	10	0	yes
SRR10271823	davies	B2	6	1	yes
SRR10271824	davies	B2	9	0	yes
SRR10271825	davies	B2	8	0	yes
SRR10271826	davies	B2	10	0	yes
SRR10271827	davies	B2	5	0	yes
SRR10271828	davies	B2	9	0	yes
SRR10271829	davies	B2	10	0	yes
SRR10271830	davies	B2	9	0	yes
SRR10271831	davies	B2	10	0	yes
SRR10271832	davies	B1	0	0	yes
SRR10271833	davies	B2	9	0	yes
SRR10271834	davies	D	6	0	yes
SRR10271835	davies	B2	6	1	yes
SRR10271836	davies	B2	4	0	yes
SRR10271837	davies	F	5	0	yes
SRR10271838	davies	B1	0	0	yes
SRR10271839	davies	B2	8	0	yes
SRR10271840	davies	D	6	0	yes
SRR10271841	davies	F	5	0	yes
SRR10271842	davies	E	6	0	yes
SRR10271843	davies	B2	10	0	yes
SRR10271844	davies	F	5	0	yes
SRR10271845	davies	B2	10	0	yes
SRR10271846	davies	A	0	0	yes
SRR10271847	davies	B2	4	0	yes
SRR10271848	davies	C	1	0	yes
SRR10271849	davies	B2	10	0	yes
SRR10271850	davies	B2	5	0	yes
SRR10271851	davies	B2	9	0	yes
SRR10271852	davies	B2	4	0	yes
SRR10271853	davies	D	6	0	yes
SRR10271854	davies	B2	10	0	yes
SRR10271855	davies	F	5	0	yes
SRR10271856	davies	D	5	0	yes
SRR10271857	davies	B2	5	0	yes
SRR10271858	davies	C	1	0	yes
SRR10271859	davies	B2	10	0	yes
SRR10271860	davies	B2	10	0	yes
SRR10271861	davies	B2	9	0	yes
SRR10271862	davies	B2	10	0	yes
SRR10271863	davies	B2	5	0	yes
SRR10271864	davies	B2	4	0	yes
SRR10271865	davies	B2	4	0	yes
SRR10271866	davies	A	1	0	yes
SRR10271867	davies	F	5	0	yes
SRR10271868	davies	D	6	0	yes
SRR10271869	davies	B2	4	0	no
SRR10271870	davies	A	1	0	yes
SRR10271871	davies	B1	1	0	no
SRR10271872	davies	B2	9	0	yes
SRR10271873	davies	B2	4	0	yes
SRR10271874	davies	E	2	0	yes
SRR10271875	davies	B2	10	0	yes
SRR10271876	davies	B2	9	0	yes
SRR10271877	davies	A	0	0	yes
SRR10271878	davies	B2	10	0	yes
SRR10271879	davies	B2	10	1	yes
SRR10271880	davies	B2	10	0	yes
SRR10271881	davies	B1	0	0	yes
SRR10271882	davies	B2	10	0	yes
SRR10271883	davies	B2	10	0	yes
SRR10271884	davies	B2	4	0	yes
SRR10271885	davies	D	6	0	yes
SRR10271886	davies	B2	9	0	yes
SRR10271887	davies	D	6	0	yes
SRR10271888	davies	D	6	0	yes
SRR10271889	davies	B2	9	0	yes
SRR10271890	davies	B1	0	0	yes
SRR10271891	davies	B2	10	0	yes
SRR10271892	davies	B1	0	0	yes
SRR10271893	davies	B2	10	0	yes
SRR10271894	davies	A	2	0	yes
SRR10271895	davies	B2	10	0	yes
SRR10271896	davies	B2	7	0	yes
SRR10271897	davies	B2	5	0	yes
SRR10271898	davies	B2	5	0	yes
SRR10271899	davies	B2	7	0	yes
SRR10271900	davies	B2	9	0	yes
SRR10271901	davies	B1	0	0	yes
SRR10271902	davies	B2	10	0	yes
SRR10271903	davies	B2	9	1	yes
SRR10271904	davies	B2	12	0	yes
SRR10271905	davies	B2	10	0	yes
SRR10271906	davies	D	6	0	yes
SRR10271907	davies	B2	9	0	yes
SRR10271908	davies	B2	9	0	yes
SRR10271909	davies	B2	7	0	yes
SRR10271910	davies	B1	0	0	yes
SRR10271911	davies	A	0	0	yes
SRR10271912	davies	B1	0	0	yes
SRR10271913	davies	B2	9	0	yes
SRR10271914	davies	C	1	0	yes
SRR10271915	davies	C	1	0	yes
SRR10271916	davies	B2	10	0	yes
SRR10271917	davies	B1	0	0	yes
SRR10271918	davies	B2	8	0	yes
SRR10271919	davies	F	7	0	yes
SRR10271920	davies	B2	10	0	no
SRR10271921	davies	B2	10	0	no
SRR10271922	davies	B2	7	0	yes
SRR10271923	davies	B2	4	0	yes
SRR10271924	davies	B2	10	0	yes
SRR10271925	davies	B2	9	0	yes
SRR10271926	davies	D	6	0	yes
SRR10271927	davies	B2	9	0	yes
SRR10271928	davies	A	1	0	yes
SRR10271929	davies	F	7	0	yes
SRR10271930	davies	B2	10	0	yes
SRR10271931	davies	A	1	0	yes
SRR10271932	davies	B2	6	1	yes
SRR10271933	davies	B2	7	0	yes
SRR10271934	davies	B2	4	0	yes
SRR10271935	davies	D	6	0	yes
SRR10271936	davies	B2	9	0	yes
SRR10271937	davies	D	5	0	yes
SRR10271938	davies	B2	8	0	yes
SRR10271939	davies	B2	9	0	yes
SRR10271940	davies	D	5	0	yes
SRR10271941	davies	B2	10	0	yes
SRR10271942	davies	B2	9	0	yes
SRR10271943	davies	B2	6	1	yes
SRR10271944	davies	C	1	0	yes
SRR10271945	davies	B1	2	0	yes
SRR10271946	davies	B2	9	0	yes
SRR10271947	davies	B2	9	0	yes
SRR10271948	davies	B2	10	0	no
SRR10271949	davies	B2	7	0	yes
SRR10271950	davies	C	2	0	yes
SRR10271951	davies	B2	8	1	yes
SRR10271952	davies	B2	10	0	yes
SRR10271953	davies	B2	7	0	yes
SRR10271954	davies	B2	9	0	yes
SRR10271955	davies	B2	4	0	yes
SRR10271956	davies	B2	4	0	yes
SRR10271957	davies	B2	4	0	yes
SRR10271958	davies	F	2	0	yes
SRR10271959	davies	B2	5	0	yes
SRR10271960	davies	D	6	0	yes
SRR10271961	davies	B2	10	0	yes
SRR10271962	davies	B2	9	0	yes
SRR10271963	davies	B2	5	1	yes
SRR10271964	davies	B2	10	0	yes
SRR10271965	davies	D	6	0	yes
SRR10271966	davies	B2	10	0	no
SRR10271967	davies	B2	10	0	yes
SRR10271968	davies	B2	4	0	yes
SRR10271969	davies	B2	5	0	yes
SRR10271970	davies	D	6	0	yes
SRR10271971	davies	D	6	0	yes
SRR10271972	davies	B2	10	0	yes
SRR10271973	davies	B2	5	0	yes
SRR10271974	davies	B2	10	0	yes
SRR10271975	davies	B2	11	0	yes
SRR10271976	davies	B2	4	0	yes
SRR10271977	davies	D	6	0	yes
SRR10271978	davies	B2	4	0	yes
SRR10271979	davies	B2	6	0	yes
SRR10271980	davies	B1	0	0	yes
SRR10271981	davies	B2	5	0	yes
SRR10271982	davies	B2	9	0	yes
SRR10271983	davies	B2	9	0	yes
SRR10271984	davies	B2	9	0	yes
SRR10271985	davies	A	0	0	yes
SRR10271986	davies	B2	10	0	yes
SRR10271987	davies	B1	0	0	yes
SRR10271988	davies	B2	9	0	yes
SRR10271989	davies	D	4	0	yes
SRR10271990	davies	D	6	0	yes
SRR10271991	davies	B2	10	0	yes
SRR10271992	davies	B2	10	0	yes
SRR10271993	davies	D	6	0	yes
SRR10271994	davies	B2	10	0	yes
SRR10271995	davies	B2	4	0	yes
SRR10271996	davies	B2	5	0	yes
SRR10271997	davies	B2	10	0	yes
SRR10271998	davies	B2	9	0	yes
SRR10271999	davies	B2	9	0	yes
SRR10272000	davies	B2	10	0	yes
SRR10272001	davies	B2	9	0	yes
SRR10272002	davies	B2	10	0	yes
SRR10272003	davies	B2	10	0	yes
SRR10272004	davies	A	1	0	yes
SRR10272005	davies	D	6	0	yes
SRR10272006	davies	C	1	0	yes
SRR10272007	davies	B2	9	0	yes
SRR10272008	davies	B2	9	0	yes
SRR10272009	davies	B2	9	0	no
SRR10272010	davies	B2	10	1	yes
SRR10272011	davies	B2	10	0	yes
SRR10272012	davies	A	1	0	yes
SRR10272013	davies	B2	10	0	yes
SRR10272014	davies	B2	9	0	yes
SRR10272015	davies	B2	9	0	yes
SRR10272016	davies	B1	0	0	yes
SRR10272017	davies	D	6	0	yes
SRR10272018	davies	B2	5	0	yes
SRR10272019	davies	D	6	0	yes
SRR10272020	davies	B2	10	0	yes
SRR10272021	davies	B1	1	0	yes
SRR10272022	davies	A	1	0	yes
SRR10272023	davies	B2	9	0	yes
SRR10272024	davies	B2	4	0	yes
SRR10272025	davies	B1	0	0	yes
SRR10272026	davies	B2	9	0	yes
SRR10272027	davies	C	1	0	yes
SRR10272028	davies	B2	8	1	yes
SRR10272029	davies	B2	10	0	yes
SRR10272030	davies	B2	4	0	yes
SRR10272031	davies	C	1	0	yes
SRR10272032	davies	B2	10	0	yes
SRR10272033	davies	B2	11	0	yes
SRR10272034	davies	B2	4	0	yes
SRR10272035	davies	B2	10	0	yes
SRR10272036	davies	B2	9	0	yes
SRR10272037	davies	B2	9	0	yes
SRR10272038	davies	B2	10	0	yes
SRR10272039	davies	A	0	0	yes
SRR10272040	davies	D	6	0	yes
SRR10272041	davies	A	1	0	yes
SRR10272042	davies	B2	4	0	yes
SRR10272043	davies	B2	7	0	yes
SRR10272044	davies	A	1	0	yes
SRR10272045	davies	B2	6	0	yes
SRR10272046	davies	B2	4	0	yes
SRR10272047	davies	B2	9	0	yes
SRR10272048	davies	B2	7	0	yes
SRR10272049	davies	D	6	0	yes
SRR10272050	davies	A	3	0	yes
SRR10272051	davies	B2	10	0	yes
SRR10272052	davies	B2	9	0	yes
SRR10272053	davies	F	5	0	yes
SRR10272054	davies	B2	10	0	yes
SRR10272055	davies	B2	9	0	yes
SRR10272056	davies	D	6	0	yes
SRR10272057	davies	B2	4	0	yes
SRR10272058	davies	E	2	0	yes
SRR10272059	davies	B2	10	0	yes
SRR10272060	davies	D	5	0	yes
SRR10272061	davies	A	0	0	yes
SRR10272062	davies	B2	10	0	yes
SRR10272063	davies	B2	4	0	yes
SRR10272064	davies	B2	10	1	yes
SRR10272065	davies	B2	9	0	no
SRR10272066	davies	B2	10	0	yes
SRR10272067	davies	B1	2	0	yes
SRR10272068	davies	B1	0	0	yes
SRR10272069	davies	B2	5	0	yes
SRR10272070	davies	B2	10	0	yes
SRR10272071	davies	B2	7	0	yes
SRR10272072	davies	B2	8	0	yes
SRR10272073	davies	B2	4	0	yes
SRR10272074	davies	D	6	0	yes
SRR10272075	davies	B2	4	0	yes
SRR10272076	davies	D	6	0	yes
SRR10272077	davies	B2	5	0	yes
SRR10272078	davies	B2	5	0	yes
SRR10272079	davies	B2	10	0	yes
SRR10272080	davies	B2	5	0	yes
SRR10272081	davies	B2	10	0	yes
SRR10272082	davies	B2	4	0	yes
SRR10272083	davies	B2	7	0	yes
SRR10272084	davies	B2	8	0	yes
SRR10272085	davies	B2	10	0	yes
SRR10272086	davies	B2	9	0	yes
SRR10272087	davies	B2	9	0	yes
SRR10272088	davies	B2	7	0	yes
SRR10272089	davies	C	1	0	yes
SRR10272090	davies	B2	10	1	yes
SRR10272091	davies	B2	9	0	yes
SRR10272092	davies	B2	10	0	yes
SRR10272093	davies	B2	5	0	yes
SRR10272094	davies	D	6	0	yes
SRR10272095	davies	B2	8	1	yes
SRR10272096	davies	C	1	0	yes
SRR10272097	davies	B2	5	0	yes
SRR10272098	davies	A	4	0	yes
SRR10272099	davies	B2	9	0	yes
SRR10272100	davies	B2	12	0	yes
SRR10272101	davies	B2	4	0	yes
SRR10272102	davies	B2	10	0	yes
SRR10272103	davies	D	6	0	yes
SRR10272104	davies	B2	10	0	yes
SRR10272105	davies	B2	10	0	yes
SRR10272106	davies	D	6	0	yes
SRR10272107	davies	B2	10	0	yes
SRR10272108	davies	B2	10	0	yes
SRR10272109	davies	B2	9	0	yes
SRR10272110	davies	B2	10	0	no
SRR10272111	davies	B2	9	0	yes
SRR10272112	davies	C	1	0	yes
SRR10272113	davies	B2	10	0	yes
SRR10272114	davies	B2	10	0	yes
SRR10272115	davies	B2	10	0	yes
SRR10272116	davies	B2	5	0	yes
SRR10272117	davies	B2	10	0	yes
SRR10272118	davies	B2	5	0	yes
SRR10272119	davies	B2	10	0	yes
SRR10272120	davies	F	5	0	yes
SRR10272121	davies	B2	10	0	yes
SRR10272122	davies	D	6	0	yes
SRR10272123	davies	B2	10	0	yes
SRR10272124	davies	B2	6	0	yes
SRR10272125	davies	B2	6	1	yes
SRR10272126	davies	B1	0	0	yes
SRR10272127	davies	A	1	0	yes
SRR10272128	davies	B2	10	0	yes
SRR10272129	davies	A	1	0	yes
SRR10272130	davies	B2	9	0	yes
SRR10272131	davies	B2	8	1	yes
SRR10272132	davies	D	7	0	yes
SRR10272133	davies	B2	5	0	yes
SRR10272134	davies	B2	5	0	no
SRR10272135	davies	B2	9	0	yes
SRR10272136	davies	B2	5	0	yes
SRR10272137	davies	B2	4	0	yes
SRR10272138	davies	B2	10	0	yes
SRR10272139	davies	B2	10	0	yes
SRR10272140	davies	B2	5	0	yes
SRR10272141	davies	B2	8	0	yes
SRR10272142	davies	B2	9	0	yes
SRR10272143	davies	B2	5	0	yes
SRR10272144	davies	B2	10	0	yes
SRR10272145	davies	D	6	0	yes
SRR10272146	davies	D	6	0	yes
SRR10272147	davies	D	6	0	yes
SRR10272148	davies	B2	9	0	yes
SRR10272149	davies	B2	4	0	yes
SRR10272150	davies	B2	4	0	yes
SRR10272151	davies	D	5	0	yes
SRR10272152	davies	B1	0	0	yes
SRR10272153	davies	B2	10	0	yes
SRR10272154	davies	B2	4	0	yes
SRR10272155	davies	B2	6	1	yes
SRR10272156	davies	B2	5	0	yes
SRR10272157	davies	B2	10	0	yes
SRR10272158	davies	D	6	0	yes
SRR10272159	davies	B2	9	0	yes
SRR10272160	davies	B2	10	0	yes
SRR10272161	davies	B2	9	0	yes
SRR10272162	davies	B2	10	0	yes
SRR10272163	davies	A	1	0	yes
SRR10272164	davies	B1	0	0	yes
SRR10272165	davies	B2	9	0	no
SRR10272166	davies	D	6	0	yes
SRR10272167	davies	B2	11	0	yes
SRR10272168	davies	D	6	0	yes
SRR10272169	davies	D	5	0	yes
SRR10272170	davies	B2	9	0	yes
SRR10272171	davies	B2	7	0	yes
SRR10272172	davies	B2	4	0	yes
SRR10272173	davies	cladeV	39	1	no
SRR10272174	davies	B2	4	0	yes
SRR10272175	davies	B2	5	0	yes
SRR10272176	davies	B2	5	0	yes
SRR10272177	davies	B2	10	0	yes
SRR10272178	davies	A	0	0	yes
SRR10272179	davies	C	7	0	yes
SRR10272180	davies	B2	4	0	no
SRR10272181	davies	B2	10	0	yes
SRR10272182	davies	B2	9	0	yes
SRR10272183	davies	E or cladeI	7	0	no
SRR10272184	davies	B2	9	0	yes
SRR10272185	davies	A	0	0	yes
SRR10272186	davies	A	0	0	yes
SRR10272187	davies	D	6	0	yes
SRR10272188	davies	B2	4	0	yes
SRR10272189	davies	D	6	0	yes
SRR10272190	davies	C	1	0	yes
SRR10272191	davies	B2	5	0	yes
SRR10272192	davies	B2	9	0	yes
SRR10272193	davies	D	6	0	yes
SRR10272194	davies	F	5	0	yes
SRR10272195	davies	B2	5	0	yes
SRR10272196	davies	D	6	0	yes
SRR10272197	davies	B2	10	0	no
SRR10272198	davies	Unknown	1	0	no
SRR10272199	davies	B2	4	0	yes
SRR10272200	davies	B2	7	0	yes
SRR10272201	davies	B2	8	1	yes
SRR10272202	davies	B2	9	0	yes
SRR10272203	davies	D	6	0	yes
SRR10272204	davies	G	6	0	yes
SRR10272205	davies	F	5	0	yes
SRR10272206	davies	B2	10	0	yes
SRR10272207	davies	B2	7	0	yes
SRR10272208	davies	B2	9	0	yes
SRR10272209	davies	B2	5	0	yes
SRR10272210	davies	B2	4	0	yes
SRR10272211	davies	B2	9	0	yes
SRR10272212	davies	C	1	0	yes
SRR10272213	davies	B2	10	0	yes
SRR10272214	davies	B2	10	0	yes
SRR10272215	davies	B1	0	0	yes
SRR10272216	davies	B2	6	0	yes
SRR10272217	davies	B1	0	0	yes
SRR10272218	davies	D	6	0	yes
SRR10272219	davies	B2	4	0	yes
SRR10272220	davies	B2	8	0	yes
SRR10272221	davies	A	1	0	yes
SRR10272222	davies	B2	10	0	yes
SRR10272223	davies	B2	9	0	yes
SRR10272224	davies	B2	9	0	yes
SRR10272225	davies	B2	12	0	yes
SRR10272226	davies	B2	10	0	yes
SRR10272227	davies	B2	9	0	yes
SRR10272228	davies	A	1	0	yes
SRR10272229	davies	B2	9	0	yes
SRR10272230	davies	D	6	0	yes
SRR10272231	davies	D	6	0	yes
SRR10272232	davies	D	6	0	yes
SRR10272233	davies	B2	5	0	yes
SRR10272234	davies	B2	7	0	yes
SRR10272235	davies	C	1	0	yes
SRR10272236	davies	D	6	0	yes
SRR10272237	davies	B2	4	0	no
SRR10272238	davies	B2	6	0	yes
SRR10272239	davies	B2	10	0	yes
SRR10272240	davies	B2	6	1	yes
SRR10272241	davies	B2	9	0	yes
SRR10272242	davies	B2	8	1	yes
SRR10272243	davies	B2	11	0	yes
SRR10272244	davies	B2	4	0	yes
SRR10272245	davies	D	6	0	yes
SRR10272246	davies	D	6	0	yes
SRR10272247	davies	B2	9	0	yes
SRR10272248	davies	D	6	0	yes
SRR10272249	davies	B2	9	0	yes
SRR10272250	davies	B2	7	0	no
SRR10272251	davies	B2	4	0	yes
SRR10272252	davies	B1	0	0	yes
SRR10272253	davies	B2	9	0	yes
SRR10272254	davies	B2	10	1	yes
SRR10272255	davies	F	5	0	yes
SRR10272256	davies	B2	4	0	yes
SRR10272257	davies	B2	4	0	yes
SRR10272258	davies	B2	9	0	yes
SRR10272259	davies	D	6	0	yes
SRR10272260	davies	B2	8	0	yes
SRR10272261	davies	B2	8	0	yes
SRR10272262	davies	B2	9	0	yes
SRR10272263	davies	A	0	0	yes
SRR10272264	davies	B2	10	0	yes
SRR10272265	davies	B2	10	0	yes
SRR10272266	davies	B2	9	0	yes
SRR10272267	davies	A	0	0	yes
SRR10272268	davies	D	6	0	yes
SRR10272269	davies	B2	9	0	yes
SRR10272270	davies	B2	9	0	yes
SRR10272271	davies	B2	4	0	no
SRR10272272	davies	cladeV	39	1	no
SRR10272273	davies	B2	10	0	no
SRR10272274	davies	C	1	0	yes
SRR10272275	davies	B2	5	0	yes
SRR10272276	davies	B2	10	0	yes
SRR10272277	davies	B2	5	0	yes
SRR10272278	davies	B2	10	0	yes
SRR10272279	davies	A	0	0	yes
SRR10272280	davies	B2	10	0	yes
SRR10272281	davies	C	1	0	yes
SRR10272282	davies	B2	5	0	yes
SRR10272283	davies	B2	9	0	yes
SRR10272284	davies	A	0	0	yes
SRR10272285	davies	cladeV	40	1	no
SRR10272286	davies	D	6	0	yes
SRR10272287	davies	C	1	0	yes
SRR10272288	davies	B2	9	0	yes
SRR10272289	davies	B2	7	0	yes
SRR10272290	davies	F	5	0	yes
SRR10272291	davies	D	6	0	yes
SRR10272292	davies	B2	9	0	yes
SRR10272293	davies	B2	10	0	yes
SRR10272294	davies	B2	10	0	no
SRR10272295	davies	B2	11	0	yes
SRR10272296	davies	D	6	0	yes
SRR10272297	davies	B2	9	0	yes
SRR10272298	davies	B2	4	0	yes
SRR10272299	davies	B2	10	0	no
SRR10272300	davies	D	5	0	yes
SRR10272301	davies	F	5	0	yes
SRR10272302	davies	D	6	0	yes
SRR10272303	davies	B2	5	0	yes
SRR10272304	davies	B2	7	0	yes
SRR10272305	davies	B2	4	0	yes
SRR10272306	davies	B2	10	0	yes
SRR10272307	davies	D	5	0	yes
SRR10272308	davies	A	0	0	yes
SRR10272309	davies	B2	10	0	yes
SRR10272310	davies	D	6	0	yes
SRR10272311	davies	B2	9	0	yes
SRR10272312	davies	D	6	0	yes
SRR10272313	davies	B2	9	0	yes
SRR10272314	davies	B2	9	0	yes
SRR10272315	davies	A	1	0	yes
SRR10272316	davies	B2	11	0	yes
SRR10272317	davies	B2	9	0	yes
SRR10272318	davies	D	8	0	yes
SRR10272319	davies	B2	9	0	yes
SRR10272320	davies	B2	10	0	yes
SRR10272321	davies	B2	10	0	no
SRR10272322	davies	D	6	0	yes
SRR10272323	davies	B2	8	1	yes
SRR10272324	davies	D	6	0	yes
SRR10272325	davies	B2	11	0	yes
SRR10272326	davies	B2	4	0	yes
SRR10272327	davies	B2	5	0	yes
SRR10272328	davies	B2	8	1	yes
SRR10272329	davies	F	5	0	yes
SRR10272330	davies	B2	9	0	yes
SRR10272331	davies	B2	8	0	yes
SRR10272332	davies	B2	4	0	yes
SRR10272333	davies	B2	10	0	yes
SRR10272334	davies	G	6	0	yes
SRR10272335	davies	B2	9	0	yes
SRR10272336	davies	B2	10	0	yes
SRR10272337	davies	B2	10	0	yes
SRR10272338	davies	B2	10	0	yes
SRR10272339	davies	A	2	0	yes
SRR10272340	davies	D	6	0	yes
SRR10272341	davies	B2	4	0	yes
SRR10272342	davies	B2	5	0	yes
SRR10272343	davies	B2	7	0	yes
SRR10272344	davies	B2	5	0	yes
SRR10272345	davies	B2	6	0	yes
SRR10272346	davies	B2	10	0	yes
SRR10272347	davies	B2	6	1	yes
SRR10272348	davies	A	0	0	yes
SRR10272349	davies	B2	9	0	yes
SRR10272350	davies	B2	4	0	yes
SRR10272351	davies	B2	8	0	yes
SRR10272352	davies	D	6	0	yes
SRR10272353	davies	D	6	0	yes
SRR10272354	davies	B2	10	0	yes
SRR10272355	davies	B2	9	0	yes
SRR10272356	davies	D	6	0	yes
SRR10272357	davies	B2	9	0	yes
SRR10272358	davies	B2	4	0	yes
SRR10272359	davies	B2	5	0	no
SRR10272360	davies	B1	0	0	yes
SRR10272361	davies	B2	9	0	yes
SRR10272362	davies	B2	5	0	yes
SRR10272363	davies	G	6	0	yes
SRR10272364	davies	D	6	0	yes
SRR10272365	davies	B1	0	0	yes
SRR10272366	davies	B1	1	0	yes
SRR10272367	davies	B2	10	0	yes
SRR10272368	davies	B1	1	0	yes
SRR10272369	davies	D	6	0	yes
SRR10272370	davies	B2	9	0	yes
SRR10272371	davies	B2	10	0	yes
SRR10272372	davies	B2	7	0	no
SRR10272373	davies	B2	10	0	no
SRR10272374	davies	B2	5	0	yes
SRR10272375	davies	B1	0	0	yes
SRR10272376	davies	B2	10	0	yes
SRR10272377	davies	B2	9	0	yes
SRR10272378	davies	B2	7	0	yes
SRR10272379	davies	D	6	0	yes
SRR10272380	davies	C	1	0	yes
SRR10272381	davies	B2	10	0	yes
SRR10272382	davies	A	2	0	yes
SRR10272383	davies	B2	4	0	no
SRR10272384	davies	D	6	0	yes
SRR10272385	davies	B2	10	0	yes
SRR10272386	davies	B2	9	0	yes
SRR10272387	davies	D	6	0	yes
SRR10272388	davies	B2	5	0	yes
SRR10272389	davies	B2	7	0	yes
SRR10272390	davies	B2	5	0	yes
SRR10272391	davies	B2	5	0	yes
SRR10272392	davies	B2	9	0	yes
SRR10272393	davies	B2	4	0	yes
SRR10272394	davies	B2	11	0	yes
SRR10272395	davies	B2	8	0	yes
SRR10272396	davies	B2	9	0	yes
SRR10272397	davies	B2	9	0	yes
SRR10272398	davies	B2	5	0	yes
SRR10272399	davies	B1	0	0	yes
SRR10272400	davies	D	6	0	yes
SRR10272401	davies	cladeV	41	1	no
SRR10272402	davies	B2	9	0	no
SRR10272403	davies	D	6	0	yes
SRR10272404	davies	B2	10	0	yes
SRR10272405	davies	D	6	0	yes
SRR10272406	davies	D	5	0	yes
SRR10272407	davies	B2	9	0	yes
SRR10272408	davies	B2	10	0	yes
SRR10272409	davies	A	1	0	yes
SRR10272410	davies	D	6	0	yes
SRR10272411	davies	B2	9	0	yes
SRR10272412	davies	B2	9	0	yes
SRR10272413	davies	D	6	0	yes
SRR10272414	davies	D	6	0	yes
SRR10272415	davies	B2	10	0	yes
SRR10272416	davies	D	6	0	yes
SRR10272417	davies	B2	10	0	yes
SRR10272418	davies	B2	9	0	yes
SRR10272419	davies	B2	9	0	yes
SRR10272420	davies	B2	8	0	yes
SRR10272421	davies	B2	10	0	yes
SRR10272422	davies	D	5	0	yes
SRR10272423	davies	B2	9	0	yes
SRR10272424	davies	A	0	0	yes
SRR10272425	davies	B2	9	0	yes
SRR10272426	davies	F	5	0	yes
SRR10272427	davies	A	2	0	yes
SRR10272428	davies	B2	5	0	yes
SRR10272429	davies	B2	10	0	yes
SRR10272430	davies	B2	5	0	yes
SRR10272431	davies	A	1	0	yes
SRR10272432	davies	G	6	0	yes
SRR10272433	davies	B2	10	0	yes
lpxC	davies	NA	NA	0	no
	davies	NA	NA	0	no
st:	davies	NA	NA	0	no
ststxt	davies	NA	NA	0	no
run-blst-lpxCsh	davies	NA	NA	0	no
SRR11817624	shen	A	0	0	no
SRR11939512	shen	A	4	0	no
SRR11939513	shen	B1	0	0	no
SRR11939514	shen	B1	0	0	no
SRR11939515	shen	A	0	0	no
SRR11939516	shen	A	1	1	no
SRR11939517	shen	A	0	0	no
SRR11939518	shen	B1	0	0	no
SRR11939519	shen	A	0	0	no
SRR11939520	shen	A	0	0	no
SRR11939521	shen	B1	0	0	no
SRR11939522	shen	B1	0	0	no
SRR11939523	shen	A	0	0	no
SRR11939524	shen	A	0	0	yes
SRR11939525	shen	A	0	0	yes
SRR11939526	shen	B1	0	0	no
SRR11939527	shen	A	0	0	no
SRR11939528	shen	A	0	0	no
SRR11939529	shen	A	2	0	no
SRR11939530	shen	B1	0	0	yes
SRR11939531	shen	A	0	0	no
SRR11939532	shen	A	0	0	no
SRR11939533	shen	B1	0	0	no
SRR11939534	shen	B1	0	0	no
SRR15731667	shen	A	1	0	no
SRR15731668	shen	A	1	0	no
SRR15731669	shen	D	6	0	no
SRR15731670	shen	A	0	0	no
SRR15731671	shen	A	2	0	no
SRR15731672	shen	A	0	0	no
SRR15731673	shen	A	0	0	no
SRR15731674	shen	A	0	0	no
SRR15731675	shen	A	1	0	no
SRR15731676	shen	A	1	0	no
SRR15731677	shen	A	1	0	no
SRR15731678	shen	A	1	0	no
SRR15731679	shen	D	6	0	no
SRR15731680	shen	A	3	0	no
SRR15731681	shen	A	0	0	no
SRR15731682	shen	A	1	0	no
SRR15731683	shen	A	2	0	no
SRR15731684	shen	F	6	0	no
SRR15731685	shen	A	0	0	no
SRR15731686	shen	B1	0	0	no
SRR15731687	shen	A	0	0	no
SRR15731688	shen	E	2	0	yes
SRR15731689	shen	B1	1	0	no
SRR15731690	shen	A	0	0	no
SRR15731691	shen	A	1	0	no
SRR15731692	shen	A	0	0	no
SRR15731693	shen	A	3	0	no
SRR15731694	shen	A	3	0	no
SRR15731695	shen	A	0	0	no
SRR15731696	shen	A	0	0	no
SRR15731697	shen	A	0	0	no
SRR15731698	shen	A	4	0	no
SRR15731699	shen	A	0	0	no
SRR15731700	shen	A	0	0	no
SRR15731701	shen	D	6	0	no
SRR15731702	shen	A	1	0	no
SRR15731703	shen	A	2	0	no
SRR15731704	shen	B1	0	0	yes
SRR15731705	shen	B1	0	0	no
SRR15731706	shen	A	4	0	no
SRR15731707	shen	G	6	0	no
SRR15731708	shen	A	0	0	yes
SRR15731709	shen	cladeI	12	0	no
SRR15731710	shen	B1	0	0	yes
SRR15731711	shen	A	0	0	yes
SRR15731712	shen	B1	0	0	yes
SRR15731713	shen	A	0	0	no
SRR15731714	shen	B1	0	0	yes
SRR15731715	shen	B1	0	0	yes
SRR15731716	shen	B1	3	0	yes
SRR15731717	shen	A	3	0	no
SRR15731718	shen	A	2	0	no
SRR15731719	shen	A	0	0	no
SRR15731720	shen	A	1	0	no
SRR15731721	shen	A	0	0	no
SRR15731722	shen	A	1	0	no
SRR15731723	shen	A	1	0	no
SRR15731724	shen	B1	0	0	no
SRR15731725	shen	A	0	0	no
SRR15731726	shen	A	3	0	no
SRR15731727	shen	A	3	0	no
SRR15731728	shen	A	3	0	no
SRR15731729	shen	A	3	0	yes
SRR15731730	shen	A	1	0	no
SRR15731731	shen	A	1	0	no
SRR15731732	shen	B1	1	0	no
SRR15731733	shen	A	0	0	no
SRR15731734	shen	E	1	0	no
SRR15731735	shen	A	1	1	no
SRR15731736	shen	E	1	0	no
SRR15731737	shen	A	1	0	no
SRR15731738	shen	A	1	0	no
SRR15731739	shen	A	2	0	no
SRR15731740	shen	A	4	0	no
SRR15731741	shen	E or cladeI	2	0	no
SRR15731742	shen	A	0	0	no
SRR15731743	shen	A	1	0	no
SRR15731744	shen	A	4	0	no
SRR15731745	shen	B1	2	0	no
SRR15731746	shen	A	0	0	no
SRR15731747	shen	A	1	0	no
SRR15731748	shen	B1	0	0	no
SRR15731749	shen	A	3	0	no
SRR15731750	shen	G	6	0	no
SRR15731751	shen	A	1	0	no
SRR15731752	shen	A	0	0	no
SRR15731753	shen	B1	0	0	no
SRR15731754	shen	B1	1	0	yes
SRR15731755	shen	B1	2	0	yes
SRR15731756	shen	B1	2	0	no
SRR15731757	shen	A	0	0	no
SRR15731758	shen	B1	0	0	no
SRR15731759	shen	A	1	0	yes
SRR15731760	shen	A	0	0	yes
SRR15731761	shen	A	1	0	no
SRR15731762	shen	E	2	0	no
SRR15731763	shen	E	2	0	no
SRR15731764	shen	B1	1	0	no
SRR15731765	shen	A	0	0	no
SRR15731766	shen	A	0	0	no
SRR15731767	shen	A	1	0	no
SRR15731768	shen	A	0	0	no
SRR15731769	shen	A	0	0	no
SRR15731770	shen	A	1	0	no
SRR15731771	shen	A	1	0	no
SRR15731772	shen	A	2	0	no
SRR15731773	shen	A	1	0	no
SRR15731774	shen	A	4	0	no
SRR15731775	shen	A	1	0	no
SRR15731776	shen	A	0	0	no
SRR15731777	shen	A	0	0	no
SRR15731778	shen	A	1	0	no
SRR15731779	shen	A	1	0	no
SRR15731780	shen	B1	0	0	no
SRR15731781	shen	A	0	0	no
SRR15731782	shen	A	2	0	no
SRR15731783	shen	A	0	0	no
SRR15731784	shen	A	0	0	no
SRR15731785	shen	A	0	0	no
SRR15731786	shen	A	1	0	no
SRR15731787	shen	B1	0	0	no
SRR15731788	shen	F	5	0	no
SRR15731789	shen	B1	1	0	no
SRR15731790	shen	B1	0	0	no
SRR15731791	shen	A	0	0	no
SRR15731792	shen	B1	0	0	no
SRR15731793	shen	A	3	0	no
SRR15731794	shen	A	0	0	no
SRR15731795	shen	A	0	0	no
SRR15731796	shen	A	0	0	no
SRR15731797	shen	A	0	0	no
SRR15731798	shen	A	3	0	no
SRR15731799	shen	A	0	0	no
SRR15731800	shen	A	0	0	no
SRR15731801	shen	A	4	0	no
SRR15731802	shen	B1	0	0	no
SRR15731803	shen	A	1	0	no
SRR15731804	shen	B1	0	0	no
SRR15731805	shen	B1	0	0	no
SRR15731806	shen	B1	0	0	no
SRR15731807	shen	B1	0	0	no
SRR15731808	shen	A	3	0	no
SRR15731809	shen	A	1	0	yes
SRR15731810	shen	A	1	0	no
SRR15731811	shen	F	6	0	no
SRR15731812	shen	A	0	0	no
SRR15731813	shen	B1	1	0	yes
SRR15731814	shen	B1	0	0	no
SRR15731815	shen	A	0	0	no
SRR15731816	shen	F	5	0	no
SRR15731817	shen	A	1	0	yes
SRR15731818	shen	A	2	0	no
SRR15731819	shen	G	6	0	yes
SRR15731820	shen	G	6	0	no
SRR15731821	shen	A	0	0	no
SRR15731822	shen	B2	4	0	yes
SRR15731823	shen	E	2	0	no
SRR15731824	shen	B1	0	0	yes
SRR15731825	shen	G	6	0	yes
SRR15731826	shen	G	6	0	no
SRR15731827	shen	B1	1	0	no
SRR15731828	shen	A	0	0	no
SRR15731829	shen	F	6	0	no
SRR15731830	shen	B2	9	0	no
SRR15731831	shen	B1	0	0	yes
SRR15731832	shen	C	1	0	no
SRR15731833	shen	B1	1	0	no
SRR15731834	shen	D	6	0	no
SRR15731835	shen	A	0	0	no
SRR15731836	shen	F	6	0	no
SRR15731837	shen	B2	9	0	no
SRR15731838	shen	G	6	0	no
SRR15731839	shen	A	0	0	no
SRR15731840	shen	A	4	0	yes
SRR15731841	shen	Unknown	3	0	no
SRR15731842	shen	A	0	0	no
SRR15731843	shen	B1	0	0	no
SRR15731844	shen	B1	2	0	yes
SRR15731845	shen	A	3	0	no
SRR15731846	shen	A	0	0	no
SRR15731847	shen	A	2	0	no
SRR15731848	shen	A	2	0	yes
SRR15731849	shen	A	1	0	no
SRR15731850	shen	A	0	0	no
SRR15731851	shen	A	2	0	no
SRR15731852	shen	A	0	0	no
SRR15731853	shen	A	0	0	no
SRR15731854	shen	B2	10	0	no
SRR15731855	shen	A	1	0	no
SRR15731856	shen	B1	3	0	no
SRR15731857	shen	A	0	0	no
SRR15731858	shen	A	0	0	no
SRR15731859	shen	A	2	0	no
SRR15731860	shen	A	0	0	no
SRR15731861	shen	D	0	0	yes
SRR15731862	shen	B2	9	0	no
SRR15731863	shen	B2	9	0	no
SRR15731864	shen	B1	0	0	no
SRR15731865	shen	A	0	0	yes
SRR15731866	shen	A	0	0	yes
SRR15731867	shen	A	0	0	no
SRR15731868	shen	B1	1	0	no
SRR15731869	shen	A	3	3	no
SRR15731870	shen	A	4	0	yes
SRR15731871	shen	F	6	0	yes
SRR15731872	shen	A	0	0	yes
SRR15731873	shen	A	0	0	no
SRR15731874	shen	B1	2	0	yes
SRR15731875	shen	B1	0	0	no
SRR15731876	shen	B1	2	0	yes
SRR15731877	shen	B1	1	0	yes
SRR15731878	shen	B1	2	0	no
SRR15731879	shen	B1	2	0	yes
SRR15731880	shen	B1	0	0	no
SRR15731881	shen	B2	9	0	yes
SRR15731882	shen	B2	4	0	yes
SRR15731883	shen	C	1	0	yes
SRR15731884	shen	C	1	0	yes
SRR15731885	shen	B1	0	0	yes
SRR15731886	shen	D	6	0	no
SRR15731887	shen	A	0	0	no
SRR15731888	shen	A	0	0	no
SRR15731889	shen	A	0	0	yes
SRR15731890	shen	A	0	0	no
SRR15731891	shen	E	1	0	no
SRR15731892	shen	E	1	0	yes
SRR15731893	shen	A	0	0	no
SRR15731894	shen	A	0	0	no
SRR15731895	shen	B1	0	0	yes
SRR15731896	shen	A	0	0	yes
SRR15731897	shen	A	1	0	no
SRR15731898	shen	A	2	0	no
SRR15731899	shen	B1	0	0	no
SRR15731900	shen	A	4	0	yes
SRR15731901	shen	A	0	0	yes
SRR15731902	shen	A	1	0	yes
SRR15731903	shen	C	1	0	yes
SRR15731904	shen	A	4	0	no
SRR15731905	shen	B1	2	0	yes
SRR15731906	shen	A	3	0	yes
SRR15731907	shen	A	0	0	yes
SRR15731908	shen	A	2	0	yes
SRR15731909	shen	A	1	0	no
SRR15731910	shen	A	0	0	yes
SRR15731911	shen	C	1	0	yes
SRR15731912	shen	B1	2	0	yes
SRR15731913	shen	A	0	0	yes
SRR15731914	shen	B1	2	0	yes
SRR15731915	shen	A	0	0	yes
SRR15731916	shen	B1	2	0	yes
SRR15731917	shen	A	0	0	no
SRR15731918	shen	C	1	0	no
SRR15731919	shen	A	1	0	yes
SRR15731920	shen	A	0	0	no
SRR15731921	shen	B1	0	0	yes
SRR15731922	shen	A	0	0	no
SRR15731923	shen	A	0	0	yes
SRR15731924	shen	A	1	0	yes
SRR15731925	shen	A	4	0	no
SRR15731926	shen	A	0	0	yes
SRR15731927	shen	B1	2	0	yes
SRR15731928	shen	A	0	0	no
SRR15731929	shen	A	1	0	no
SRR15731930	shen	B1	1	0	yes
SRR15731931	shen	B1	0	0	no
SRR15731932	shen	A	3	0	no
SRR15731933	shen	A	3	0	no
SRR15731934	shen	B1	1	0	no
SRR15731935	shen	A	0	0	no
SRR15731936	shen	A	0	0	no
SRR15731937	shen	B1	0	0	no
SRR15731938	shen	B1	0	0	no
SRR15731939	shen	B2	4	0	no
SRR15731940	shen	A	2	0	no
SRR15731941	shen	A	0	0	no
SRR15731942	shen	A	0	0	no
SRR15731943	shen	B2	4	0	no
SRR15731944	shen	A	0	0	no
SRR15731945	shen	B1	0	0	no
SRR15731946	shen	A	0	0	no
SRR15731947	shen	A	0	0	no
SRR15731948	shen	B1	0	0	no
SRR15731949	shen	A	0	0	no
SRR15731950	shen	B1	0	0	no
SRR15731951	shen	A	0	0	no
SRR15731952	shen	B1	1	0	no
SRR15731953	shen	A	0	0	no
SRR15731954	shen	D	6	0	no
SRR15731955	shen	A	0	0	no
SRR15731956	shen	A	3	1	no
SRR15731957	shen	A	0	0	no
SRR15731958	shen	A	2	0	no
SRR15731959	shen	B1	1	0	no
SRR15731960	shen	A	0	0	no
SRR15731961	shen	A	2	0	no
SRR15731962	shen	B1	0	0	no
SRR15731963	shen	B1	0	0	no
SRR15731964	shen	A	2	0	no
SRR15731965	shen	A	1	0	no
SRR15731966	shen	A	0	0	no
SRR15731967	shen	A	3	0	no
SRR15731968	shen	A	0	0	no
SRR15731969	shen	A	0	0	no
SRR15731970	shen	B1	0	0	no
SRR15731971	shen	A	3	0	no
SRR15731972	shen	A	4	0	no
SRR15731973	shen	A	0	0	no
SRR15731974	shen	B1	0	0	no
SRR15731975	shen	A	2	0	yes
SRR15731976	shen	G	7	1	yes
SRR15731977	shen	A	1	0	yes
SRR15731978	shen	B1	0	0	yes
SRR15731979	shen	A	0	0	no
SRR15731980	shen	cladeI	8	0	no
SRR15731981	shen	A	1	0	no
SRR15731982	shen	B1	0	0	no
SRR15731983	shen	D	6	0	yes
SRR15731984	shen	A	4	0	no
SRR15731985	shen	B1	1	0	no
SRR15731986	shen	B1	0	0	no
SRR15731987	shen	A	1	0	no
SRR15731988	shen	A	0	0	no
SRR15731989	shen	B1	1	0	no
SRR15731990	shen	A	0	0	no
SRR15731991	shen	A	0	0	no
SRR15731992	shen	A	0	0	no
SRR15731993	shen	A	0	0	no
SRR15731994	shen	B2	4	0	no
SRR15731995	shen	E	2	0	no
SRR15731996	shen	A	2	0	no
SRR15731997	shen	A	0	0	no
SRR15731998	shen	B1	1	0	no
SRR15731999	shen	A	2	0	no
SRR15732000	shen	A	2	0	no
SRR15732001	shen	A	2	0	no
SRR15732002	shen	B1	0	0	no
SRR15732003	shen	A	0	0	no
SRR15732004	shen	A	3	0	no
SRR15732005	shen	A	2	0	yes
SRR15732006	shen	A	4	0	no
SRR15732007	shen	B1	0	0	no
SRR15732008	shen	A	3	0	no
SRR15732009	shen	A	0	0	no
SRR15732010	shen	A	4	0	no
SRR15732011	shen	A	0	0	no
SRR15732012	shen	B1	0	0	no
SRR15732013	shen	A	1	0	no
SRR15732014	shen	A	0	0	no
SRR15732015	shen	B1	1	0	no
SRR15732016	shen	B1	0	0	no
SRR15732017	shen	A	1	0	yes
SRR15732018	shen	A	0	0	no
SRR15732019	shen	A	2	0	yes
SRR15732020	shen	B1	0	0	no
SRR15732021	shen	B1	2	0	no
SRR15732022	shen	A	2	0	yes
SRR15732023	shen	B1	0	0	no
SRR15732024	shen	B1	1	0	yes
SRR15732025	shen	A	1	0	no
SRR15732026	shen	A	0	0	yes
SRR15732027	shen	B1	0	0	no
SRR15732028	shen	A	0	0	no
SRR15732029	shen	A	1	0	no
SRR15732030	shen	A	3	0	no
SRR15732031	shen	A	3	0	no
SRR15732032	shen	A	3	0	no
SRR15732033	shen	B1	1	0	no
SRR15732034	shen	A	1	1	no
SRR15732035	shen	A	3	0	no
SRR15732036	shen	C	1	0	no
SRR15732037	shen	A	1	0	no
SRR15732038	shen	B1	0	0	no
SRR15732039	shen	B1	0	0	no
SRR15732040	shen	B1	0	0	no
SRR15732041	shen	A	1	0	no
SRR15732042	shen	A	1	0	no
SRR15732043	shen	B1	4	1	yes
SRR15732044	shen	A	1	0	yes
SRR15732045	shen	A	0	0	no
SRR15732046	shen	A	1	1	no
SRR15732047	shen	A	1	0	no
SRR15732048	shen	A	2	0	no
SRR15732049	shen	A	0	0	no
SRR15732050	shen	B1	0	0	no
SRR15732051	shen	A	0	0	no
SRR15732052	shen	A	0	0	no
SRR15732053	shen	A	1	0	no
SRR15732054	shen	A	0	0	no
SRR15732055	shen	B1	0	0	no
SRR15732056	shen	B1	2	0	no
SRR15732057	shen	A	4	0	no
SRR15732058	shen	A	4	0	no
SRR15732059	shen	A	2	0	no
SRR15732060	shen	B1	0	0	yes
SRR15732061	shen	G	6	0	yes
SRR15732062	shen	B2	10	0	no
SRR15732063	shen	A	1	0	no
SRR15732064	shen	C	1	0	no
SRR15732065	shen	A	2	0	no
SRR15732066	shen	A	1	0	no
SRR15732067	shen	A	1	0	no
SRR15732068	shen	D	6	0	no
SRR15732069	shen	B1	0	0	yes
SRR15732070	shen	B1	0	0	no
SRR15732071	shen	A	0	0	no
SRR15732072	shen	B1	1	0	yes
SRR15732073	shen	B1	0	0	no
SRR15732074	shen	A	4	0	no
SRR15732075	shen	B2	9	0	no
SRR15732076	shen	C	1	0	yes
SRR15732077	shen	F	5	0	no
SRR15732078	shen	D	0	0	no
SRR15732079	shen	B1	1	0	yes
SRR15732080	shen	B1	0	0	yes
SRR15732081	shen	D	6	0	no
SRR15732082	shen	D	8	0	yes
SRR15732083	shen	cladeI	12	0	no
SRR15732084	shen	D	6	0	yes
SRR15732085	shen	A	0	0	yes
SRR15732086	shen	A	4	0	yes
SRR15732087	shen	A	1	0	yes
SRR15732088	shen	A	1	0	yes
SRR15732089	shen	G	6	0	yes
SRR15732090	shen	B1	0	0	no
SRR15732091	shen	A	0	0	yes
SRR15732092	shen	A	1	0	no
SRR15732093	shen	A	0	0	yes
SRR15732094	shen	cladeI	12	0	no
SRR15732095	shen	A	1	0	yes
SRR15732096	shen	A	0	0	yes
SRR15732097	shen	A	0	0	yes
SRR15732098	shen	A	2	0	yes
SRR15732099	shen	B1	0	0	no
SRR15732100	shen	E	1	0	no
SRR15732101	shen	B1	1	0	yes
SRR15732102	shen	A	0	0	no
SRR15732103	shen	B1	0	0	no
SRR15732104	shen	A	2	0	no
SRR15732105	shen	D	0	0	no
SRR15732106	shen	E	1	0	no
SRR15732107	shen	A	2	0	no
SRR15732108	shen	B1	1	0	yes
SRR15732109	shen	A	1	0	no
SRR15732110	shen	A	2	0	yes
SRR15732111	shen	B1	1	0	yes
SRR15732112	shen	A	0	0	no
SRR15732113	shen	A	3	0	no
SRR15732114	shen	A	0	0	no
SRR15732115	shen	A	1	0	no
SRR15732116	shen	A	0	0	no
SRR15732117	shen	B1	0	0	yes
SRR15732118	shen	B1	2	0	no
SRR15732119	shen	A	1	0	yes
SRR15732120	shen	A	1	0	yes
SRR15732121	shen	A	0	0	no
SRR15732122	shen	A	0	0	yes
SRR15732123	shen	A	0	0	yes
SRR15732124	shen	C	1	0	yes
SRR15732125	shen	C	1	0	no
SRR15732126	shen	B1	0	0	no
SRR15732127	shen	A	0	0	yes
SRR15732128	shen	A	0	0	yes
SRR15732129	shen	A	0	0	yes
SRR15732130	shen	A	2	0	yes
SRR15732131	shen	C	1	0	yes
SRR15732132	shen	D	6	0	no
SRR15732133	shen	D	6	0	no
SRR15732134	shen	A	2	0	no
SRR15732135	shen	A	2	0	no
SRR15732136	shen	B1	1	0	no
SRR15732137	shen	A	0	0	yes
SRR15732138	shen	A	0	0	no
SRR15732139	shen	A	0	0	no
SRR15732140	shen	B1	0	0	yes
SRR15732141	shen	A	1	0	yes
SRR15732142	shen	B1	1	0	yes
SRR15732143	shen	B1	1	0	yes
SRR15732144	shen	B1	0	0	yes
SRR15732145	shen	A	1	0	no
SRR15732146	shen	A	1	0	no
SRR15732147	shen	A	0	0	no
SRR15732148	shen	A	2	0	yes
SRR15732149	shen	A	0	0	no
SRR15732150	shen	A	0	0	no
SRR15732151	shen	D	6	0	no
SRR15732152	shen	B1	0	0	no
SRR15732153	shen	B1	1	0	no
SRR15732154	shen	A	0	0	no
SRR15732155	shen	B1	0	0	no
SRR15732156	shen	A	2	0	yes
[truncated: 174 more rows]
